# Supplementary material
Source: HighWire-hosted journal article supplement (https://www.cmajopen.ca/highwire/filestream/89320/field_highwire_adjunct_files/5/open-2021-0119-6-at.pdf)
Supplement: open-2021-0119-6-at.pdf [file open-2021-0119-6-at.pdf]

## APPENDIX 6: INCLUSION AND EXCLUSION CRITERIA FOR INCLUDED STUDIES

| RCT                                                                                                                                                                                                                                         | Major Inclusion Criteria                                                                                                                                                                                                                         | Major Exclusion Criteria                                                                                                                                                                                                                                                                                                                                                                                                                                                                                                                                                                   |
|---------------------------------------------------------------------------------------------------------------------------------------------------------------------------------------------------------------------------------------------|--------------------------------------------------------------------------------------------------------------------------------------------------------------------------------------------------------------------------------------------------|--------------------------------------------------------------------------------------------------------------------------------------------------------------------------------------------------------------------------------------------------------------------------------------------------------------------------------------------------------------------------------------------------------------------------------------------------------------------------------------------------------------------------------------------------------------------------------------------|
| PRODIGY <sup>7</sup>                                                                                                                                                                                                                        | Chronic Stable coronary artery disease or ACS including non-ST-elevation and STEMI with at least 1 lesion with a diameter stenosis of $\geq 50\%$ with a reference vessel diameter of $\geq 2.25$ mm                                             | Known allergy to acetylsalicylic acid or clopidogrel, history of bleeding diathesis, active bleeding or previous stroke in the past 6 months, concomitant need of oral anticoagulant therapy, scheduled elective surgery within 24 months of PCI, major surgery within 15 days                                                                                                                                                                                                                                                                                                             |
| DES-LATE <sup>5</sup>                                                                                                                                                                                                                       | All candidates for DAPT after DES implantation who had not had a major adverse cardiovascular event or major bleeding for 12 months after PCI                                                                                                    | Life expectancy < 1 year, concomitant vascular disease that required the long-term use of clopidogrel or other established indications for clopidogrel therapy                                                                                                                                                                                                                                                                                                                                                                                                                             |
| ARCTIC- Interruption <sup>6</sup>                                                                                                                                                                                                           | Planned DES implantation                                                                                                                                                                                                                         | Primary PCI for STEMI, planned use of GPIIb/IIIa inhibitors, chronic anticoagulation treatment, or bleeding diathesis                                                                                                                                                                                                                                                                                                                                                                                                                                                                      |
| ITALIC <sup>3</sup>                                                                                                                                                                                                                         | Candidates pre-treated with DAPT after implanted with at least 1 Xience V DES                                                                                                                                                                    | Primary PCI for acute MI and treatment of the left main artery, nonresponders to Aspirin resistance test, prior DES implantation within 1 year, oral anticoagulation therapy or abciximab treatment during hospital stay, scheduled elective surgery within 12 months, known hemorrhagic diathesis                                                                                                                                                                                                                                                                                         |
| DAPT <sup>4</sup>                                                                                                                                                                                                                           | All candidates for DAPT after treatment with FDA-approved DES or BMS who had not had a major adverse cardiovascular or cerebrovascular event, repeat revascularization, or moderate or severe bleeding 12 months after PCI                       | Use of stent with diameter < 2.25 mm or > 4.0 mm, scheduled elective surgery within 30 months, concomitant need of oral anticoagulant therapy, patient treated with both DES and BMS, a life expectancy < 3 years                                                                                                                                                                                                                                                                                                                                                                          |
| OPTIDUAL <sup>2</sup>                                                                                                                                                                                                                       | Symptoms of stable angina, silent ischemia, or ACS with $\geq 1$ lesion with stenosis > 50% located in a native vessel $\geq 2.25$ mm in diameter and implanted with $\geq 1$ DES or BMS and treated with clopidogrel plus aspirin for 12 months | Requirement for oral anticoagulant, DES implantation in an unprotected left main coronary artery, malignancy or other coexisting conditions associated with life expectancy < 2 years, other revascularization with a DES within 9 months or a BMS within 4 weeks prior to this study                                                                                                                                                                                                                                                                                                      |
| NIPPON <sup>1</sup>                                                                                                                                                                                                                         | “Optimal indication for percutaneous coronary intervention” and no known contraindications to dual antiplatelet therapy, including patients with acute MI                                                                                        | Cardiogenic shock at the time of PCI, concomitant disease for which a thienopyridine was essential for treatment, history of stent thrombosis, ejection fraction < 30%, Life expectancy < 1 year, active bleeding condition, planned surgery necessitating discontinuation of antiplatelet therapy (> 14 days) within 18 months, index stent procedure for a saphenous vein graft, in-stent restenosis of DES, or unprotected LMT lesion; history of intracranial bleeding or ischemic stroke within 6 months before enrollment. DES for another lesion within 6 months prior to index PCI |
| Note: ACS = Acute coronary syndrome, BMS = bare-metal stent, DAPT = dual anti-platelet therapy, DES = drug-eluting stent, MI = myocardial infarction, PCI = percutaneous coronary intervention, STEMI = ST-elevation myocardial infarction. |                                                                                                                                                                                                                                                  |                                                                                                                                                                                                                                                                                                                                                                                                                                                                                                                                                                                            |

Appendix 6, as supplied by the authors. Appendix to: Elliott J, Kelly SE, Bai Z, et al. Extended dual antiplatelet therapy following percutaneous coronary intervention in clinically important patient subgroups: a systematic review and meta-analysis. *CMAJ Open* 2023. doi:10.9778/cmajo.2021-0119. Copyright © 2023 The Author(s) or their employer(s). To receive this resource in an accessible format, please contact us at [cmajgroup@cmaj.ca](mailto:cmajgroup@cmaj.ca).
